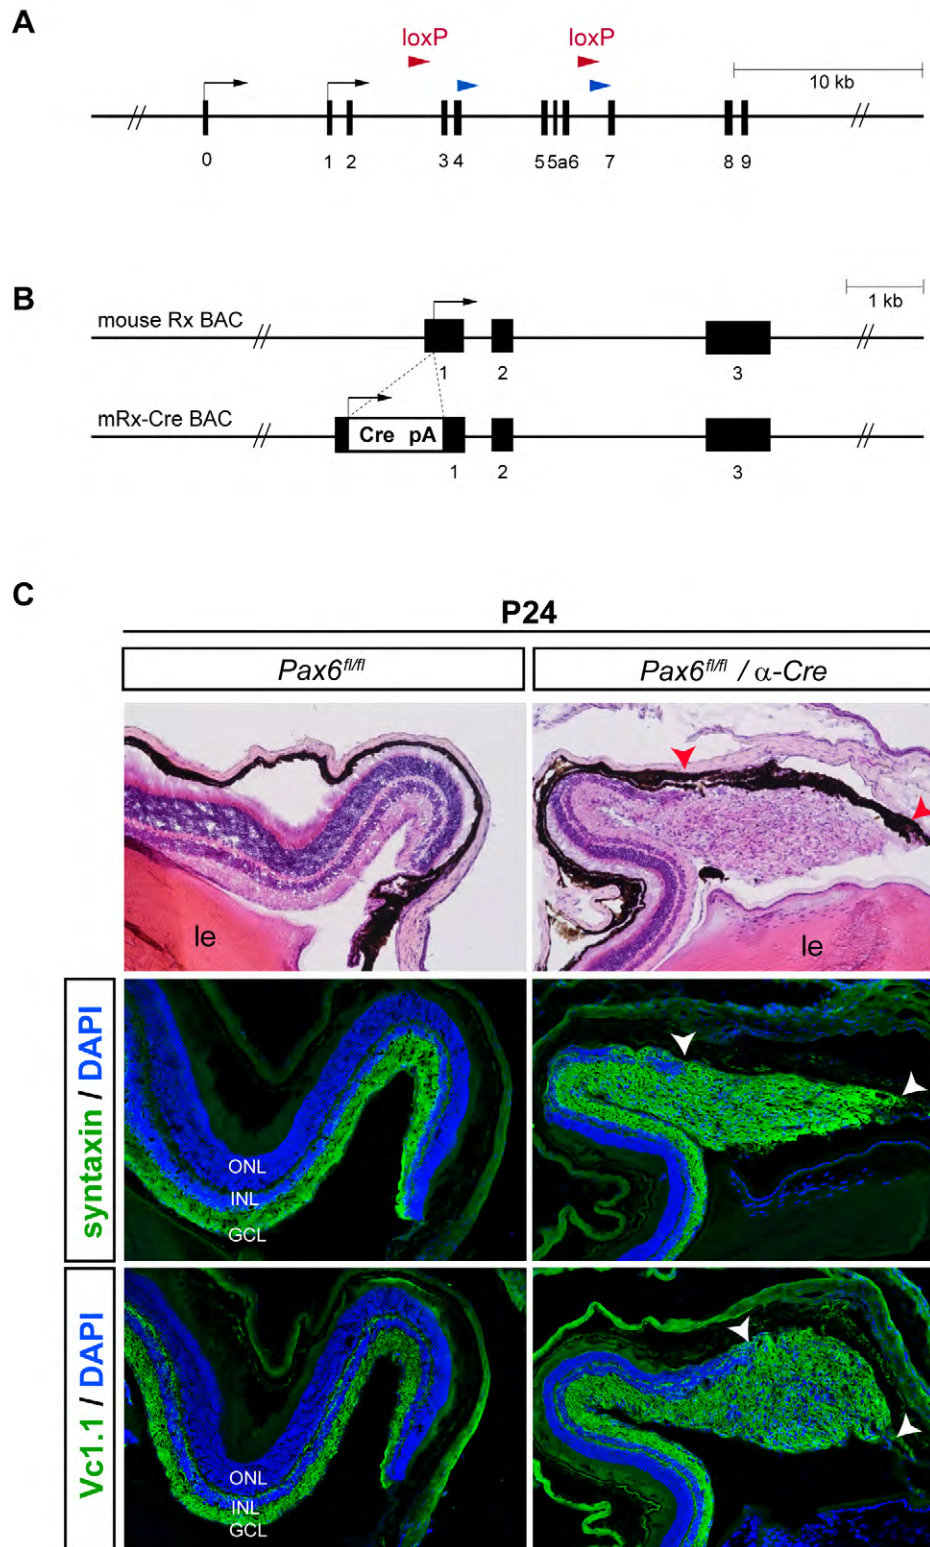

**Supplementary Fig. S1. Schematic representation of mouse lines *Pax6<sup>fl/fl</sup>* and *mRx-Cre* used in this study.** (A) To generate *Pax6<sup>fl/fl</sup>*, loxP sites flanking exons 3-6 (red arrowheads) were introduced into *Pax6* locus by homologous recombination in embryonic stem cells. The paired domain of *Pax6* is encoded by exons 5, 5a, 6 and 7. Blue arrowheads represent positions of loxP sites in *Pax6<sup>fl/fl</sup>* mice generated previously (Ashery-Padan et al., 2000). Details of gene targeting are available upon request. (B) To generate *mRx-Cre*, BAC containing 200kb covering the *Rx* locus was modified by BAC recombineering. The *Cre* coding region (Cre-pA) was inserted into the *Rx* translational initiation start site (ATG). Exons are indicated by black boxes. (C) *Pax6<sup>fl/fl</sup>* mice generated in this study were crossed with *α-Cre* to show that amacrine cells are generated in *Pax6<sup>fl/fl</sup>/α-Cre* mutants as previously reported (Marquardt et al., 2001). Adult retinal sections were stained with antibodies against amacrine cell markers syntaxin and Vc1.1 (HNK-1 epitope); retinal areas with amacrine cells are indicated with arrowheads. le, lens; ONL, outer nuclear layer; INL, inner nuclear layer; GCL, ganglion cell layer.

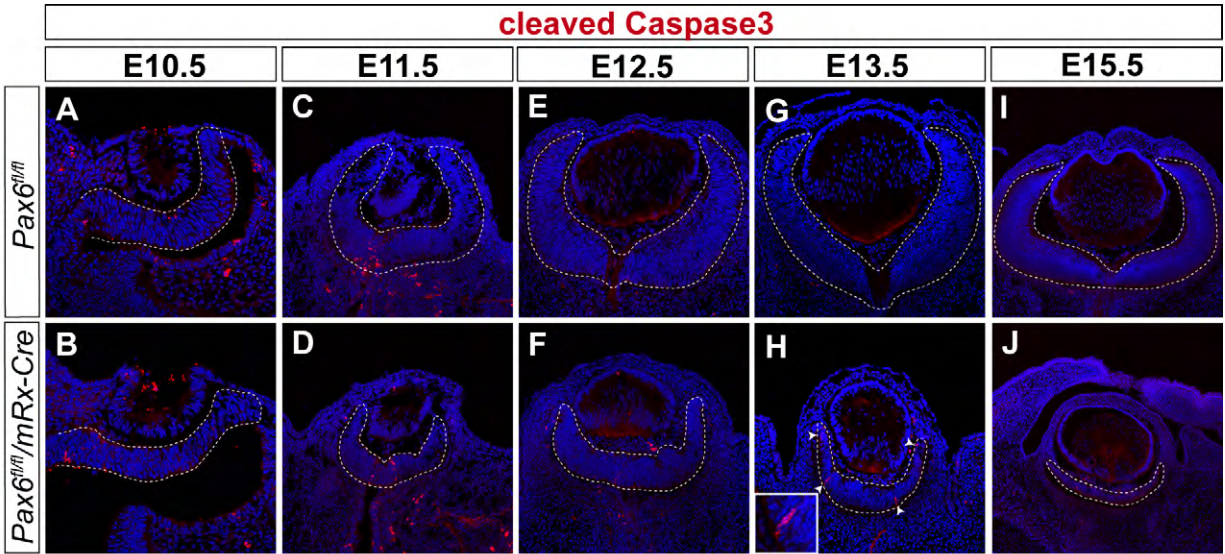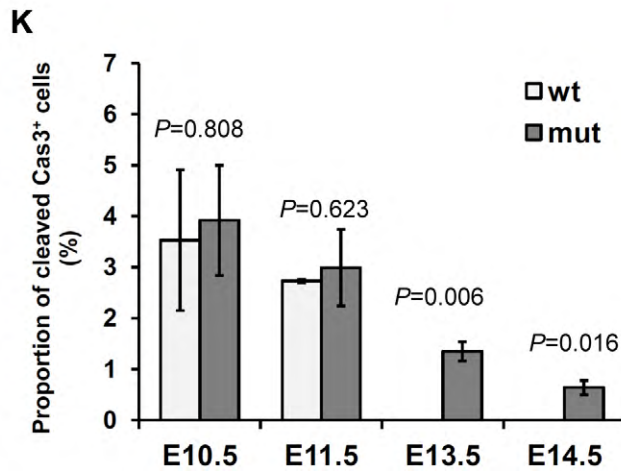

**Supplementary Fig. S2. Apoptosis in *Pax6*-deficient retina.** (A-J) Retinal sections of wild-type (*Pax6<sup>fl/fl</sup>*) and mutant (*Pax6<sup>fl/fl</sup>/mRx-Cre*) embryos were stained with antibody against cleaved Caspase3 (Cas3) at indicated stages. Retina is indicated with dashed line. (K) Quantification of apoptotic cells determined as proportion of Cas3<sup>+</sup> cells versus DAPI<sup>+</sup> cells in wild-type (wt) and *Pax6*-deficient (mut) retinas. Error bars indicate s.d. *P*-values are by Student's *t*-test.

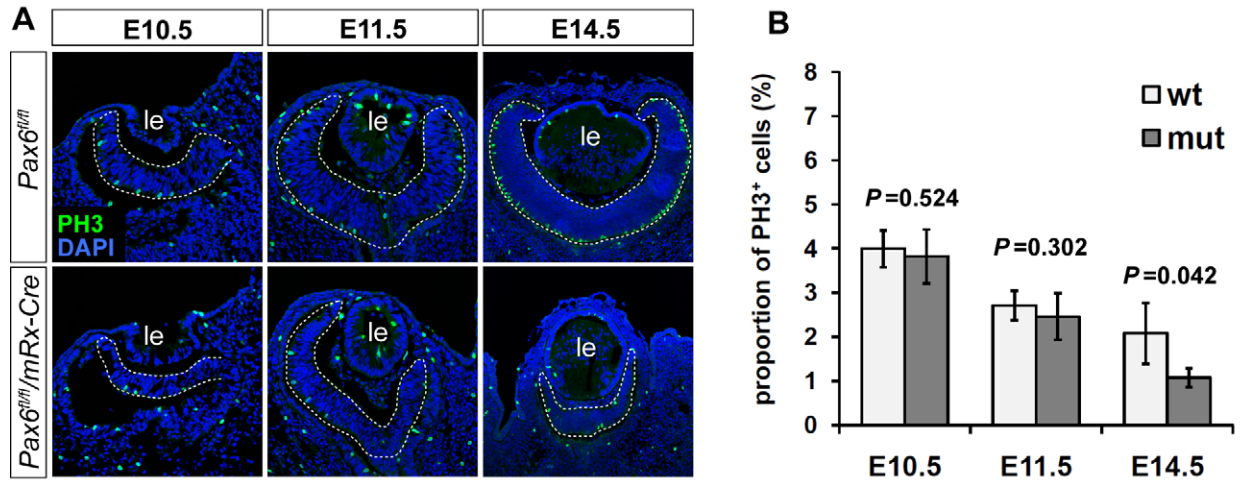

**Supplementary Fig. S3. M-phase cell cycle arrest does not contribute to early proliferation phenotype in *Pax6*-deficient retina.** (A) Sections stained with antibody against phosphorylated histone H3 (PH3) at E10.5, E11.5 and E14.5. (B) Quantification of M-phase cells determined as proportion of PH3<sup>+</sup> cells versus DAPI<sup>+</sup> cells in wild-type (wt) and *Pax6*-deficient (mut) retinas (indicated with dashed lines). Error bars indicate s.d. *P*-values are by Student's *t*-test. le, lens

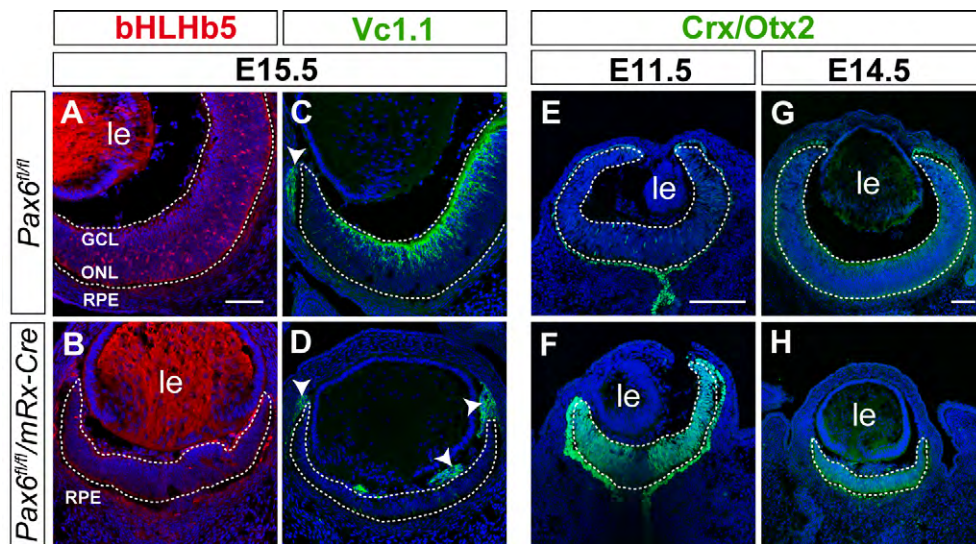

**Supplementary Fig. S4. Expression of bHLHb5, Vc1.1 and Crx in *Pax6*-deficient retina.** (A-D) Confocal images showing bHLHb5 (A,B) and Vc1.1 (HNK-1 epitope) (C,D) immunoreactivity in wild-type (*Pax6<sup>fl/fl</sup>*) and *Pax6*-deficient (*Pax6<sup>fl/fl</sup>/mRx-Cre*) retina at E15.5. Arrowheads indicate Vc1.1 immunoreactivity in non-retinal tissue (B,C). (E-H) Crx protein expression assessed using Crx/Otx2 antibody at E11.5 (E, F) and E14.5 (G, H). Dashed lines indicate the position of retina. le, lens; GCL, ganglion cell layer; ONL, outer nuclear layer; RPE, retinal pigmented epithelium. Scale bar: 100  $\mu$ m.



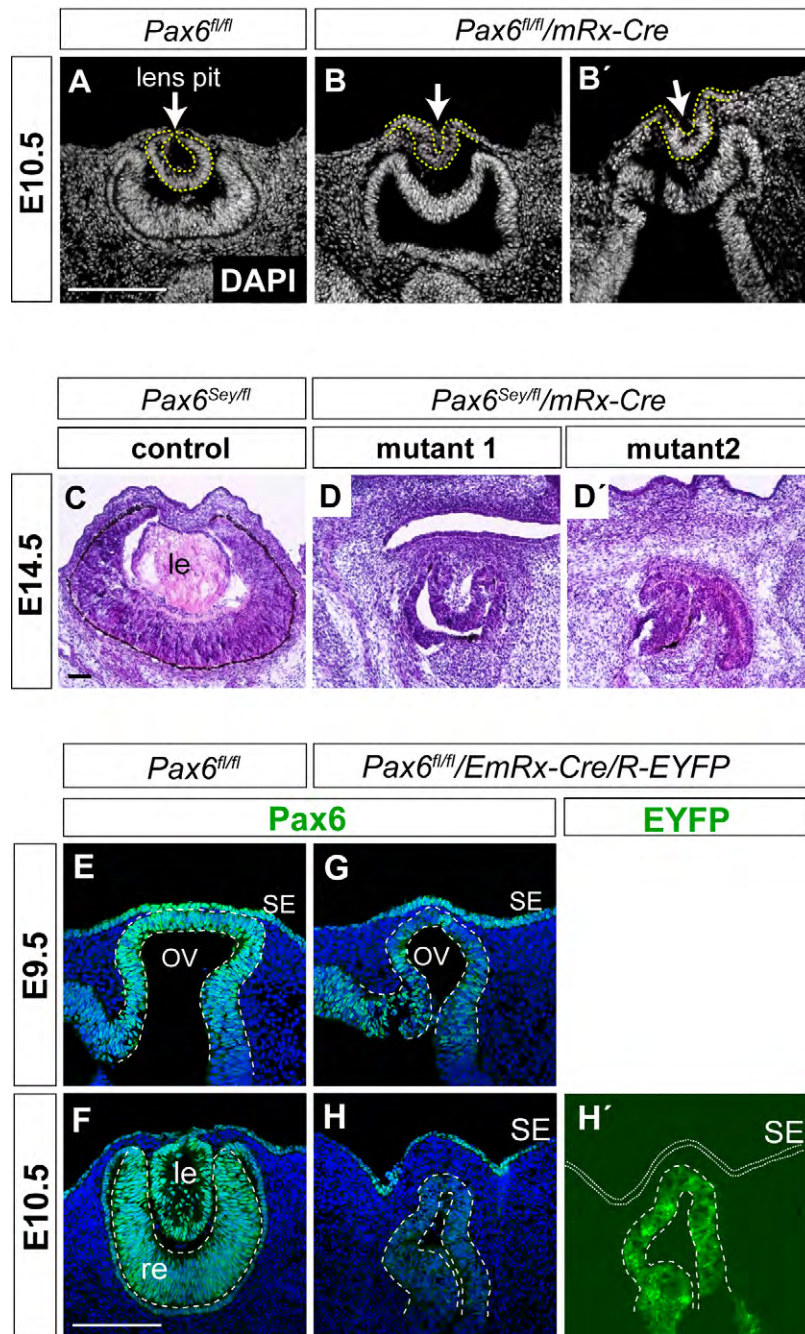

**Supplementary Fig. S5. Pax6 elimination from early RPCs or OV neuroepithelium interferes with optic cup/lens pit morphogenesis.** (A-B') Transversal sections of E10.5 wild-type (*Pax6<sup>fl/fl</sup>*) and mutant (*Pax6<sup>fl/fl</sup>/mRx-Cre*) eyes of littermate embryos stained with DAPI (grey). Forming lens pit is indicated with dashed line. (C-D') Section of control (*Pax6<sup>Sey/fl</sup>*) and mutant (*Pax6<sup>Sey/fl</sup>/mRx-Cre*) eyes of littermate embryos at E14.5 stained with hematoxylin-eosin. (E-H') Sections of control (*Pax6<sup>fl/fl</sup>*) and mutant (*Pax6<sup>fl/fl</sup>/EmRx-Cre*) eyes stained with antibody against Pax6 at indicated stages. (H') Expression of EYFP showing area of Cre-mediated deletion visualized using *R-EYFP* reporter mouse line. OV, optic vesicle; SE, surface ectoderm; le, lens; re, retina. Scale bar: 100  $\mu$ m.

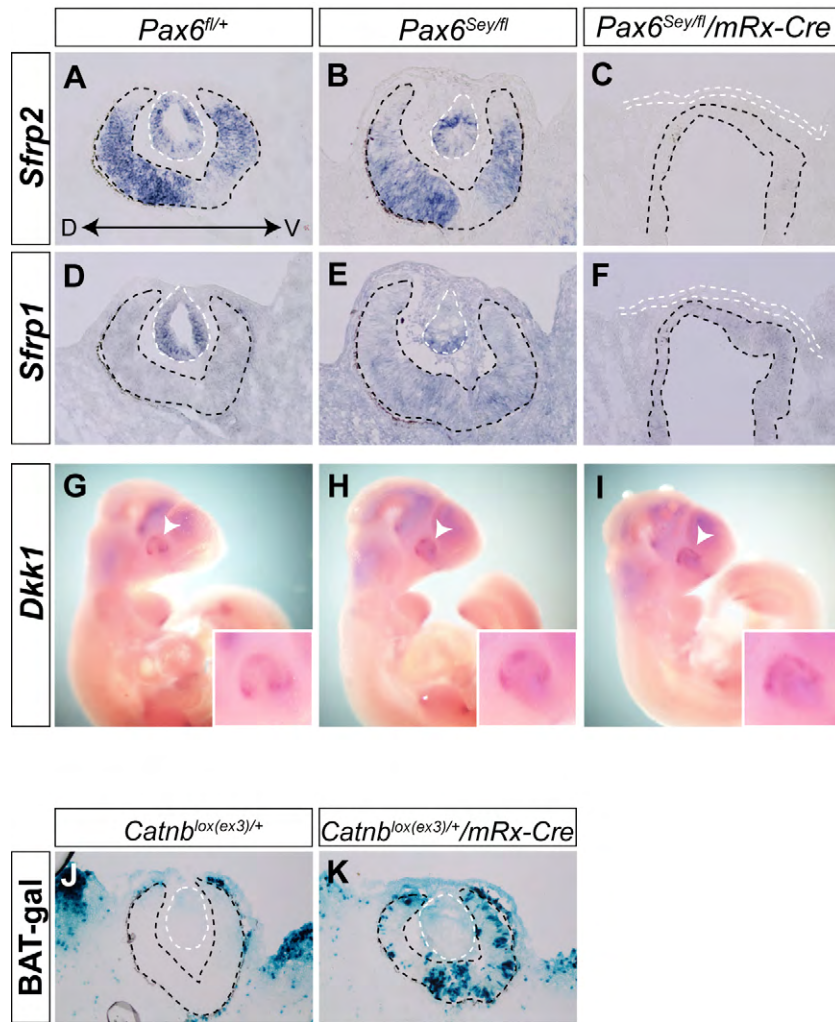

**Supplementary Fig. S6. Wnt/ $\beta$ -catenin inhibitors *Sfrp1* and *Sfrp2* are downregulated upon OV-specific *Pax6* inactivation but Wnt signaling is not responsible for the arrested lens development.** (A-F) *Sfrp2* (A-C) and *Sfrp1* (D-F) mRNA expression in control (*Pax6<sup>fl</sup>* and *Pax6<sup>Sey/fl</sup>*) and mutant (*Pax6<sup>Sey/fl</sup>/mRx-Cre*) E11.0 eyes. (G-I) *Dkk1* mRNA expression at E10.5; eye region indicated with arrowheads. (J,K) Activity of Wnt/ $\beta$ -catenin signaling assessed using a BAT-gal reporter mouse in control (*Catnb<sup>lox(ex3)/+</sup>*) (J) and retinal mutant (*Catnb<sup>lox(ex3)/+</sup>/mRx-Cre*) (K) with activated Wnt/ $\beta$ -catenin pathway in developing neuroretina. Retina is indicated with black dashed line; lens or the corresponding tissue with white dashed line.

**Table S1. Primary antibodies and RNA probes**

| <b>Primary antibodies</b> |                                                           |                 |                                                 |
|---------------------------|-----------------------------------------------------------|-----------------|-------------------------------------------------|
| <b>Antibody</b>           | <b>Host</b>                                               | <b>Dilution</b> | <b>Source</b>                                   |
| Pax6                      | Rabbit                                                    | 1:500           | Covance (PRP-278P)                              |
| Sox2                      | Goat                                                      | 1:400           | Santa-Cruz (sc-17320)                           |
| cyclin D1                 | Mouse                                                     | 1:500           | Santa-Cruz (sc-450)                             |
| p27 <sup>Kip1</sup>       | Mouse                                                     | 1:1000          | BD Biosciences (610241)                         |
| p57 <sup>Kip2</sup>       | Goat                                                      | 1:70            | Santa-Cruz (sc-1039)                            |
| Tuj1                      | Mouse                                                     | 1:1500          | R&D Systems (MAB1199)                           |
| cleaved caspase 3         | Rabbit                                                    | 1:300           | Cell Signaling (D175)                           |
| PH3                       | Rabbit                                                    | 1:1000          | Upstate (06-570)                                |
| Lef1                      | Rabbit                                                    | 1:500           | Cell Signaling (C12A5)                          |
| Pcna                      | Mouse                                                     | 1:3000          | Sigma, P8825                                    |
| Crx/Otx2                  | Rabbit                                                    | 1:500           | Kind gift from Dr Craft (Zhu and Craft, 2000)   |
| Six3                      | Rabbit                                                    | 1:2000          | Kind gift from Dr P. Bovolenta (unpublished)    |
| Otx2                      | Rabbit                                                    | 1:300           | R&D Systems (BAF1979)                           |
| Blimp1                    | Rat                                                       | 1:300           | Santa-Cruz (sc-47732)                           |
| Rxry                      | Rabbit                                                    | 1:1500          | Santa-Cruz (sc-555)                             |
| Nr2e3                     | Rabbit                                                    | 1:100           | Kind gift from Dr S. Chen (Chen et al., 2005)   |
| bHLHb5                    | Goat                                                      | 1:400           | Santa-Cruz (sc-6045)                            |
| Vc1.1 (HNK-1)             | Mouse                                                     | 1:100           | Sigma (C6680)                                   |
| Lhx2                      | Goat                                                      | 1:1000          | Santa-Cruz (sc-19344)                           |
| Hes1                      | Rabbit                                                    | 1:1000          | Kind gift from Dr N. Brown (Lee et al., 2005)   |
| Chx10                     | Sheep                                                     | 1:800           | Exalpha (X1180P)                                |
| Foxe3                     | Rabbit                                                    | 1:1000          | Kind gift from Dr Carlsson (Blixt et al., 2007) |
| Prox1                     | Rabbit                                                    | 1:2000          | Chemicon (AB5475)                               |
| BrdU                      | Rat                                                       | 1:100           | Abcam (AB6326)                                  |
| pErk1/2                   | Rabbit                                                    | 1:3000          | Cell Signaling (9101S)                          |
| pSmad1/5                  | Rabbit                                                    | 1:2000          | Invitrogen (700047)                             |
| <b>RNA probes</b>         |                                                           |                 |                                                 |
| <b>Gene</b>               | <b>Source</b>                                             |                 |                                                 |
| <i>Neurod1</i>            | Open Biosystems                                           |                 |                                                 |
| <i>p57<sup>Kip2</sup></i> | Open Biosystems                                           |                 |                                                 |
| <i>Rx</i>                 | Open Biosystems                                           |                 |                                                 |
| <i>Trβ2</i>               | Open Biosystems                                           |                 |                                                 |
| <i>Crx</i>                | Open Biosystems                                           |                 |                                                 |
| <i>Atoh7</i>              | Kindly provided by Dr Brown (Brown et al., 1998)          |                 |                                                 |
| <i>Math3</i>              | Kindly provided by Dr Brown (Farah et al., 2000)          |                 |                                                 |
| <i>Mash1</i>              | Kindly provided by Dr Brown (Brown et al., 1998)          |                 |                                                 |
| <i>Bmp4</i>               | Kindly provided by Dr Hogan (Jones et al., 1991)          |                 |                                                 |
| <i>Bmp7</i>               | Kindly provided by Dr Hogan (Lyons et al., 1995)          |                 |                                                 |
| <i>Ngn2</i>               | Kindly provided by Dr J. Rubenstein (Sommer et al., 1996) |                 |                                                 |
| <i>Sfrp1</i>              | Kindly provided by Dr S. Pleasure (Rattner et al., 1997)  |                 |                                                 |
| <i>Sfrp2</i>              | Kindly provided by Dr S. Pleasure (Rattner et al., 1997)  |                 |                                                 |
| <i>Dkk1</i>               | Kindly provided by Dr S. Krauss (Diep et al., 2004)       |                 |                                                 |
